# Supplementary material for: Can Robotic Gastrectomy Surpass Laparoscopic Gastrectomy by Acquiring Long-Term Experience? A Propensity Score Analysis of a 7-Year Experience at a Single Institution
Source: PubMed Central journal article supplement — J Gastric Cancer. 2016 Dec 20;16(4):240–6. doi: 10.5230/jgc.2016.16.4.240 (PMC5206314; doi:10.5230/jgc.2016.16.4.240), 2016-12-20
Supplement: jgc-16-240-s001.pdf [file jgc-16-240-s001.pdf]

| Preoperative N stage | 4 (100%)  | 6 (54.5%)  | 0.302 | 3 (75.0%) | 1.000 | 37 (88.1%) | 69 (69.7%) | 0.036 | 39 (92.9%) | 0.710 |
|----------------------|-----------|------------|-------|-----------|-------|------------|------------|-------|------------|-------|
| N0                   |           | 6 (54.5%)  |       | 3 (75.0%) |       |            |            |       |            |       |
| N1                   | 4 (100%)  | 5 (45.5%)  |       | 1 (25.0%) |       | 5 (11.9%)  | 30 (30.3%) |       | 3 (7.1%)   |       |
| N2                   |           |            |       |           |       |            |            |       |            |       |
| N3                   |           |            |       |           |       |            |            |       |            |       |
| Combined resection   |           |            | 1.000 |           | 1.000 |            |            | 0.793 |            | 1.000 |
| No                   | 3 (75.0%) | 10 (90.9%) |       | 4 (100%)  |       | 41 (97.6%) | 94 (94.9%) |       | 40 (95.2%) |       |
| Yes                  | 1 (25.0%) | 1 (9.1%)   |       |           |       | 1 (2.4%)   | 5 (5.1%)   |       | 2 (4.8%)   |       |
| Extent of LND        |           |            | 0.454 |           | 1.000 |            |            | 0.548 |            | 1.000 |
| < D2                 | 4 (100%)  | 7 (63.6%)  |       | 3 (75.0%) |       | 28 (66.7%) | 59 (59.6%) |       | 27 (64.3%) |       |
| ≥ D2                 |           | 4 (36.4%)  |       | 1 (25.0%) |       | 14 (33.3%) | 40 (40.4%) |       | 15 (35.7%) |       |

(continued)

| Variable                   | 2010            |                 |           |                 | 2011            |                  |           |                 |       |
|----------------------------|-----------------|-----------------|-----------|-----------------|-----------------|------------------|-----------|-----------------|-------|
|                            | After PSM       |                 | After PSM |                 | After PSM       |                  | After PSM |                 |       |
|                            | RDG<br>(n = 33) | LDG<br>(n = 85) | P         | LDG<br>(n = 33) | RDG<br>(n = 26) | LDG<br>(n = 136) | P         | LDG<br>(n = 26) | P     |
| Age                        | 53.2 ± 10.8     | 60.1 ± 12.3     | 0.006     | 56.8 ± 14.1     | 48.0 ± 10.1     | 59.4 ± 12.8      | <0.001    | 47.7 ± 11.7     | 0.930 |
| Sex                        |                 |                 | 0.292     |                 |                 |                  | 0.932     |                 | 0.771 |
| Male                       | 18 (54.5%)      | 57 (67.1%)      |           | 19 (57.6%)      | 16 (61.5%)      | 88 (64.7%)       |           | 18 (69.2%)      |       |
| Female                     | 15 (45.5%)      | 28 (32.9%)      |           | 14 (42.4%)      | 10 (38.5%)      | 48 (35.3%)       |           | 8 (30.8%)       |       |
| BMI (kg/m <sup>2</sup> )   | 24.6 ± 3.5      | 23.5 ± 2.9      | 0.098     | 24.6 ± 2.5      | 22.9 ± 4.1      | 23.7 ± 3.1       | 0.394     | 23.3 ± 2.4      | 0.706 |
| Previous abdominal surgery |                 |                 | 1.000     |                 |                 |                  | 1.000     |                 | 1.000 |
| Absent                     | 27 (81.8%)      | 68 (80.0%)      |           | 30 (90.9%)      | 22 (84.6%)      | 116 (85.3%)      |           | 21 (80.8%)      |       |
| Present                    | 6 (18.2%)       | 17 (20.0%)      |           | 3 (9.1%)        | 4 (15.4%)       | 20 (14.7%)       |           | 5 (19.2%)       |       |
| Comorbidity                |                 |                 | 0.180     |                 |                 |                  | 0.789     |                 | 1.000 |
| Absent                     | 18 (54.5%)      | 33 (38.8%)      |           | 17 (51.5%)      | 13 (50.0%)      | 61 (44.9%)       |           | 14 (53.8%)      |       |
| Present                    | 15 (45.5%)      | 52 (61.2%)      |           | 16 (48.5%)      | 13 (50.0%)      | 75 (55.1%)       |           | 12 (46.2%)      |       |
| ASA score                  |                 |                 | 0.005     |                 |                 |                  | 1.000     |                 | 1.000 |
| 1-2                        | 25 (75.8%)      | 38 (44.7%)      |           | 25 (75.8%)      | 26 (100%)       | 135 (99.3%)      |           | 26 (100%)       |       |
| 3-4                        | 8 (24.2%)       | 47 (55.3%)      |           | 8 (24.2%)       | 1 (0.7%)        | 1 (0.7%)         |           | 1 (0.7%)        |       |
| Preoperative T stage       |                 |                 | 0.928     |                 |                 |                  | 0.008     |                 | 0.397 |
| T1                         | 27 (81.9%)      | 67 (78.8%)      |           | 26 (78.8%)      | 16 (61.5%)      | 83 (61.0%)       |           | 14 (53.8%)      |       |
| T2                         | 5 (15.2%)       | 16 (18.8%)      |           | 7 (21.2%)       | 5 (19.2%)       | 42 (30.9%)       |           | 8 (30.8%)       |       |
| T3                         | 1 (3.0%)        | 2 (2.4%)        |           |                 | 2 (7.7%)        | 11 (8.1%)        |           | 4 (15.4%)       |       |
| T4                         |                 |                 |           |                 | 2 (7.7%)        |                  |           |                 |       |

| Preoperative N stage |            | 0.155      | 0.572      | 0.497       | 0.591      |
|----------------------|------------|------------|------------|-------------|------------|
| N0                   | 21 (63.6%) | 63 (74.1%) | 21 (63.6%) | 106 (77.9%) | 22 (94.6%) |
| N1                   | 11 (33.3%) | 19 (22.4%) | 11 (33.3%) | 26 (19.1%)  | 3 (11.5%)  |
| N2                   |            | 3 (3.5%)   | 1 (3.0%)   | 4 (2.9%)    | 1 (3.8%)   |
| N3                   | 1 (3.0%)   |            |            |             |            |
| Combined resection   |            |            | 1.000      | 1.000       | 1.000      |
| No                   | 30 (90.9%) | 75 (88.2%) | 29 (87.9%) | 132 (97.1%) | 26 (100%)  |
| Yes                  | 3 (9.1%)   | 10 (11.8%) | 4 (12.1%)  | 4 (2.9%)    |            |
| Extent of LND        |            | 0.747      | 0.798      | 0.452       | 1.000      |
| < D2                 | 20 (60.6%) | 56 (65.9%) | 22 (66.7%) | 39 (28.7%)  | 4 (15.4%)  |
| ≥ D2                 | 13 (39.4%) | 29 (34.1%) | 11 (33.3%) | 97 (71.3%)  | 22 (84.6%) |

(continued)

| Variable                   | 2012            |                  |           |                 | 2013            |                  |           |                 |
|----------------------------|-----------------|------------------|-----------|-----------------|-----------------|------------------|-----------|-----------------|
|                            | After PSM       |                  | After PSM |                 | After PSM       |                  | After PSM |                 |
|                            | RDG<br>(n = 21) | LDG<br>(n = 107) | P         | LDG<br>(n = 21) | RDG<br>(n = 22) | LDG<br>(n = 160) | P         | LDG<br>(n = 22) |
| Age                        | 55.4 ± 11.0     | 58.4 ± 13.5      | 0.330     | 55.7 ± 12.9     | 51.0 ± 11.5     | 58.2 ± 12.9      | 0.014     | 52.9 ± 10.6     |
| Sex                        |                 |                  | 0.603     |                 |                 |                  | 1.000     |                 |
| Male                       | 15 (71.4%)      | 67 (62.6%)       |           | 19 (90.5%)      | 15 (68.2%)      | 111 (69.4%)      |           | 17 (77.3%)      |
| Female                     | 6 (28.6%)       | 40 (37.4%)       |           | 2 (9.5%)        | 7 (31.8%)       | 49 (30.6%)       |           | 5 (22.7%)       |
| BMI (kg/m <sup>2</sup> )   | 24.1 ± 2.8      | 23.7 ± 3.5       | 0.621     | 24.0 ± 2.0      | 22.8 ± 3.2      | 23.8 ± 3.1       | 0.175     | 22.7 ± 2.9      |
| Previous abdominal surgery |                 |                  | 0.731     |                 |                 |                  | 1.000     |                 |
| Absent                     | 16 (76.2%)      | 88 (82.2%)       |           | 18 (85.7%)      | 20 (90.9%)      | 145 (90.6%)      |           | 21 (95.5%)      |
| Present                    | 5 (23.8%)       | 19 (17.8%)       |           | 3 (14.3%)       | 2 (9.1%)        | 15 (9.4%)        |           | 1 (4.5%)        |
| Comorbidity                |                 |                  | 0.363     |                 |                 |                  | 0.789     |                 |
| Absent                     | 15 (71.4%)      | 62 (57.9%)       |           | 15 (71.4%)      | 16 (72.7%)      | 84 (52.5%)       |           | 15 (68.2%)      |
| Present                    | 6 (28.6%)       | 45 (42.1%)       |           | 6 (28.6%)       | 6 (27.3%)       | 76 (47.5%)       |           | 7 (31.8%)       |
| ASA score                  |                 |                  | 1.000     |                 |                 |                  | 1.000     |                 |
| 1–2                        | 21 (100%)       | 107 (100%)       |           | 21 (100%)       | 22 (100%)       | 160 (100%)       |           | 22 (100%)       |
| 3–4                        |                 |                  |           |                 |                 |                  |           |                 |
| Preoperative T stage       |                 |                  | 0.823     |                 |                 |                  | 0.863     |                 |
| T1                         | 12 (57.1%)      | 56 (52.3%)       |           | 11 (52.4%)      | 16 (72.7%)      | 125 (78.1%)      |           | 16 (72.7%)      |
| T2                         | 5 (23.8%)       | 36 (33.6%)       |           | 6 (28.6%)       | 2 (9.1%)        | 15 (9.4%)        |           | 4 (18.2%)       |
| T3                         | 3 (14.3%)       | 11 (10.3%)       |           | 3 (14.3%)       | 3 (13.6%)       | 13 (8.1%)        |           | 1 (4.5%)        |
| T4                         | 1 (4.8%)        | 4 (3.7%)         |           | 1 (4.8%)        | 1 (4.5%)        | 7 (4.4%)         |           | 1 (4.5%)        |

| Preoperative N stage |            | 0.699       | 0.469      | 0.451      | 0.598       |
|----------------------|------------|-------------|------------|------------|-------------|
| N0                   | 14 (66.7%) | 79 (73.8%)  | 16 (76.2%) | 18 (81.8%) | 140 (87.5%) |
| N1                   | 6 (28.6%)  | 24 (22.4%)  | 4 (19.0%)  | 4 (18.2%)  | 14 (8.8%)   |
| N2                   | 1 (4.8%)   | 1 (2.9%)    |            |            | 4 (2.5%)    |
| N3                   |            | 2 (1.9%)    | 1 (4.8%)   |            | 2 (1.2%)    |
| Combined resection   |            | 0.584       | 1.000      | 0.774      | 1.000       |
| No                   | 21 (100%)  | 101 (94.4%) | 21 (100%)  | 22 (100%)  | 154 (96.2%) |
| Yes                  |            | 6 (5.6%)    |            |            | 6 (3.8%)    |
| Extent of LND        |            | 0.067       | 1.000      | 0.143      | 0.762       |
| < D2                 | 7 (33.3%)  | 62 (57.9%)  | 7 (33.3%)  | 13 (59.1%) | 122 (76.2%) |
| ≥ D2                 | 14 (66.7%) | 45 (42.1%)  | 14 (66.7%) | 9 (40.9%)  | 38 (23.8%)  |

(continued)

| Variable                   | 2014          |                |           |               | 2015          |                |           |               |       |
|----------------------------|---------------|----------------|-----------|---------------|---------------|----------------|-----------|---------------|-------|
|                            | After PSM     |                | After PSM |               | After PSM     |                | After PSM |               |       |
|                            | RDG<br>(n=41) | LDG<br>(n=110) | P         | LDG<br>(n=41) | RDG<br>(n=43) | LDG<br>(n=101) | P         | LDG<br>(n=43) | P     |
| Age                        | 56.0 ± 11.2   | 62.1 ± 13.7    | 0.012     | 55.3 ± 12.8   | 53.9 ± 11.4   | 63.6 ± 12.0    | <0.001    | 57.9 ± 12.2   | 0.118 |
| Sex                        |               |                | 0.676     |               |               |                | 1.000     |               | 0.771 |
| Male                       | 29 (70.7%)    | 72 (65.5%)     |           | 26 (63.4%)    | 25 (58.1%)    | 59 (58.4%)     |           | 24 (55.8%)    |       |
| Female                     | 12 (29.3%)    | 38 (34.5%)     |           | 15 (36.6%)    | 18 (41.9%)    | 42 (41.6%)     |           | 19 (44.2%)    |       |
| BMI (kg/m <sup>2</sup> )   | 24.4 ± 3.7    | 24.1 ± 2.9     | 0.515     | 24.5 ± 2.6    | 23.6 ± 3.3    | 23.4 ± 3.6     | 0.714     | 24.0 ± 3.9    | 0.653 |
| Previous abdominal surgery |               |                | 0.502     |               |               |                | 0.025     |               | 0.810 |
| Absent                     | 39 (95.1%)    | 99 (90.0%)     |           | 37 (90.2%)    | 30 (69.8%)    | 88 (87.1%)     |           | 32 (74.4%)    |       |
| Present                    | 2 (4.9%)      | 11 (10.0%)     |           | 4 (9.8%)      | 13 (30.2%)    | 13 (12.9%)     |           | 11 (25.6%)    |       |
| Comorbidity                |               |                | 0.040     |               |               |                | <0.001    |               | 0.508 |
| Absent                     | 24 (58.5%)    | 42 (38.2%)     |           | 24 (58.5%)    | 28 (65.1%)    | 27 (26.7%)     |           | 24 (55.8%)    |       |
| Present                    | 17 (41.5%)    | 68 (61.8%)     |           | 17 (41.5%)    | 15 (34.9%)    | 74 (73.3%)     |           | 19 (44.2%)    |       |
| ASA score                  |               |                | 1.000     |               |               |                | 0.3223    |               | 1.000 |
| 1-2                        | 41 (100%)     | 109 (99.1%)    |           | 41 (100%)     | 43 (100%)     | 96 (95.0%)     |           | 43 (100%)     |       |
| 3-4                        |               | 1 (0.9%)       |           |               |               | 5 (5.0%)       |           |               |       |
| Preoperative T stage       |               |                | 0.495     |               |               |                | 0.151     |               | 0.757 |
| T1                         | 27 (65.9%)    | 71 (64.5%)     |           | 31 (75.6%)    | 30 (69.8%)    | 57 (56.4%)     |           | 31 (2.1%)     |       |
| T2                         | 11 (26.8%)    | 22 (20.0%)     |           | 9 (22.0%)     | 7 (16.3%)     | 17 (16.8%)     |           | 6 (14.0%)     |       |
| T3                         | 3 (7.3%)      | 15 (13.6%)     |           | 1 (2.4%)      | 6 (14.0%)     | 17 (16.8%)     |           | 5 (11.6%)     |       |
| T4                         |               | 2 (1.8%)       |           |               |               | 10 (9.9%)      |           | 1 (2.3%)      |       |

| Preoperative N stage |            | 0.501       | 0.545      | 0.076      | 0.437      |
|----------------------|------------|-------------|------------|------------|------------|
| N0                   | 33 (80.5%) | 85 (77.3%)  | 36 (87.8%) | 72 (71.3%) | 36 (83.7%) |
| N1                   | 8 (19.5%)  | 19 (17.3%)  | 5 (12.2%)  | 15 (14.9%) | 6 (14.0%)  |
| N2                   |            | 4 (3.6%)    |            | 8 (7.9%)   | 1 (2.3%)   |
| N3                   |            | 2 (1.8%)    | 1 (4.8%)   | 6 (5.9%)   |            |
| Combined resection   |            | 1.000       | 1.000      | 0.323      | 1.000      |
| No                   | 41 (100%)  | 109 (99.1%) | 41 (100%)  | 96 (95.0%) | 43 (100%)  |
| Yes                  |            | 1 (0.9%)    |            | 5 (5.0%)   |            |
| Extent of LND        |            | 0.857       | 0.649      | 1.000      | 0.503      |
| < D2                 | 24 (58.5%) | 68 (61.8%)  | 27 (65.9%) | 60 (59.4%) | 29 (67.4%) |
| ≥ D2                 | 17 (41.5%) | 42 (38.2%)  | 14 (34.1%) | 41 (40.6%) | 14 (32.6%) |

PSM, propensity score matching; RDG, robotic distal gastrectomy; LDG, laparoscopic distal gastrectomy; BMI, body mass index; ASA, American Society of Anesthesiologists; LND, lymph node dissection.
